# Supplementary material for: Identification of an Immune-Related Biomarker Model Based on the CircRNA-Associated Regulatory Network for Esophageal Carcinoma
Source: Hindawi journal article supplement (doi:10.1155/2021/1334571), 2021-11-17
Supplement: f1 [file 1334571.f1.pdf]

**Supplementary Table 1. Primers utilized for qRT-PCR**

| Gene    | 5'to 3'                                                            |
|---------|--------------------------------------------------------------------|
| RASGRP1 | Forward ACATCACCCAGTTCCGAATGA<br>Reverse GCTGTCAATGAGATCGTCCAG     |
| MAPK14  | Forward TCAGTCCATCATTCATGCGAAA<br>Reverse AACGTCCAACAGACCAATCAC    |
| RARB    | Forward CCCCAGAACAAGACACCATGA<br>Reverse TTTTGTCGGTTCCTCAAGGTC     |
| DKK1    | Forward CCTTGAACTCGGTTCTCAATTCC<br>Reverse CAATGGTCTGGTACTTATTCCCG |
| HMGB1   | Forward TATGGCAAAGCGGACAAGG<br>Reverse CTTCGCAACATCACCAATGGA       |
| PTK2    | Forward AGTGGACCAGGAAATTGCTTTG<br>Reverse GTGTTTTGGCCTTGACAGAATC   |
| IGF1R   | Forward AGGATATTGGGCTTTACAACCTG<br>Reverse GAGGTAACAGAGGTCAGCATTTT |
| GAPDH   | Forward GGAGCGAGATCCCTCCAAAT<br>Reverse GGCTGTTGTCATACTTCTCATGG    |
